# Supplementary material
Source: Springer Nature journal article supplement (https://www.springermedizin.de/resource/supplementary/12943_2013_1178_MOESM1_ESM.pdf/9552268)
Supplement: MOESM1 [file 9552268]

Table S1. Ion channel genes involved in this study

| Gene symbol     | Gene title                                                     | Channel type                       |
|-----------------|----------------------------------------------------------------|------------------------------------|
| <i>ANO1</i>     | anoctamin 1, Calcium activated chloride channel                | Calcium activated chloride channel |
| <i>ANO2</i>     | anoctamin 2                                                    | Calcium activated chloride channel |
| <i>CACNA1A</i>  | calcium channel, voltage-dependent, P/Q type, alpha 1A subunit | Voltage-gated calcium channels     |
| <i>CACNA1B</i>  | calcium channel, voltage-dependent, N type, alpha 1B subunit   | Voltage-gated calcium channels     |
| <i>CACNA1C</i>  | calcium channel, voltage-dependent, L type, alpha 1C subunit   | Voltage-gated calcium channels     |
| <i>CACNA1D</i>  | calcium channel, voltage-dependent, L type, alpha 1D subunit   | Voltage-gated calcium channels     |
| <i>CACNA1E</i>  | calcium channel, voltage-dependent, R type, alpha 1E subunit   | Voltage-gated calcium channels     |
| <i>CACNA1F</i>  | calcium channel, voltage-dependent, L type, alpha 1F subunit   | Voltage-gated calcium channels     |
| <i>CACNA1G</i>  | calcium channel, voltage-dependent, T type, alpha 1G subunit   | Voltage-gated calcium channels     |
| <i>CACNA1H</i>  | calcium channel, voltage-dependent, T type, alpha 1H subunit   | Voltage-gated calcium channels     |
| <i>CACNA1I</i>  | calcium channel, voltage-dependent, T type, alpha 1I subunit   | Voltage-gated calcium channels     |
| <i>CACNA1S</i>  | calcium channel, voltage-dependent, L type, alpha 1S subunit   | Voltage-gated calcium channels     |
| <i>CACNA2D1</i> | calcium channel, voltage-dependent, alpha 2/delta subunit 1    | Voltage-gated calcium channels     |
| <i>CACNA2D2</i> | calcium channel, voltage-dependent, alpha 2/delta subunit 2    | Voltage-gated calcium channels     |
| <i>CACNA2D3</i> | calcium channel, voltage-dependent, alpha 2/delta subunit 3    | Voltage-gated calcium channels     |
| <i>CACNA2D4</i> | calcium channel, voltage-dependent, alpha 2/delta subunit 4    | Voltage-gated calcium channels     |
| <i>CACNB1</i>   | calcium channel, voltage-dependent, beta 1 subunit             | Voltage-gated calcium channels     |
| <i>CACNB2</i>   | calcium channel, voltage-dependent, beta 2 subunit             | Voltage-gated calcium channels     |
| <i>CACNB3</i>   | calcium channel, voltage-dependent, beta 3 subunit             | Voltage-gated calcium channels     |
| <i>CACNB4</i>   | calcium channel, voltage-dependent, beta 4 subunit             | Voltage-gated calcium channels     |
| <i>CACNG1</i>   | calcium channel, voltage-dependent, gamma subunit 1            | Voltage-gated calcium channels     |
| <i>CACNG2</i>   | calcium channel, voltage-dependent, gamma subunit 2            | Voltage-gated calcium channels     |
| <i>CACNG3</i>   | calcium channel, voltage-dependent, gamma subunit 3            | Voltage-gated calcium channels     |
| <i>CACNG4</i>   | calcium channel, voltage-dependent, gamma subunit 4            | Voltage-gated calcium channels     |
| <i>CACNG5</i>   | calcium channel, voltage-dependent, gamma subunit 5            | Voltage-gated calcium channels     |
| <i>CACNG6</i>   | calcium channel, voltage-dependent, gamma subunit 6            | Voltage-gated calcium channels     |
| <i>CACNG7</i>   | calcium channel, voltage-dependent, gamma subunit 7            | Voltage-gated calcium channels     |
| <i>CACNG8</i>   | calcium channel, voltage-dependent, gamma subunit 8            | Voltage-gated calcium channels     |
| <i>CATSPER1</i> | cation channel, sperm associated 1                             | CatSper and Two-Pore channels      |
| <i>CATSPER2</i> | cation channel, sperm associated 2                             | CatSper and Two-Pore channels      |
| <i>CATSPER3</i> | cation channel, sperm associated 3                             | CatSper and Two-Pore channels      |
| <i>CATSPER4</i> | cation channel, sperm associated 4                             | CatSper and Two-Pore channels      |
| <i>CATSPERB</i> | catsper channel auxiliary subunit beta                         | CatSper and Two-Pore channels      |
| <i>CATSPERD</i> | catsper channel auxiliary subunit delta                        | CatSper and Two-Pore channels      |
| <i>CATSPERG</i> | catsper channel auxiliary subunit gamma                        | CatSper and Two-Pore channels      |
| <i>CHRNA1</i>   | cholinergic receptor, nicotinic, alpha 1 (muscle)              | Nicotinic acetylcholine receptors  |
| <i>CHRNA10</i>  | cholinergic receptor, nicotinic, alpha 10 (neuronal)           | Nicotinic acetylcholine receptors  |
| <i>CHRNA2</i>   | cholinergic receptor, nicotinic, alpha 2 (neuronal)            | Nicotinic acetylcholine receptors  |

|                |                                                     |                                      |
|----------------|-----------------------------------------------------|--------------------------------------|
| <i>CHRNA3</i>  | cholinergic receptor, nicotinic, alpha 3 (neuronal) | Nicotinic acetylcholine receptors    |
| <i>CHRNA4</i>  | cholinergic receptor, nicotinic, alpha 4 (neuronal) | Nicotinic acetylcholine receptors    |
| <i>CHRNA5</i>  | cholinergic receptor, nicotinic, alpha 5 (neuronal) | Nicotinic acetylcholine receptors    |
| <i>CHRNA6</i>  | cholinergic receptor, nicotinic, alpha 6 (neuronal) | Nicotinic acetylcholine receptors    |
| <i>CHRNA7</i>  | cholinergic receptor, nicotinic, alpha 7 (neuronal) | Nicotinic acetylcholine receptors    |
| <i>CHRNA9</i>  | cholinergic receptor, nicotinic, alpha 9 (neuronal) | Nicotinic acetylcholine receptors    |
| <i>CHRNB1</i>  | cholinergic receptor, nicotinic, beta 1 (muscle)    | Nicotinic acetylcholine receptors    |
| <i>CHRNB2</i>  | cholinergic receptor, nicotinic, beta 2 (neuronal)  | Nicotinic acetylcholine receptors    |
| <i>CHRNB3</i>  | cholinergic receptor, nicotinic, beta 3 (neuronal)  | Nicotinic acetylcholine receptors    |
| <i>CHRNB4</i>  | cholinergic receptor, nicotinic, beta 4 (neuronal)  | Nicotinic acetylcholine receptors    |
| <i>CHRND</i>   | cholinergic receptor, nicotinic, delta (muscle)     | Nicotinic acetylcholine receptors    |
| <i>CHRNE</i>   | cholinergic receptor, nicotinic, epsilon (muscle)   | Nicotinic acetylcholine receptors    |
| <i>CHRNG</i>   | cholinergic receptor, nicotinic, gamma (muscle)     | Nicotinic acetylcholine receptors    |
| <i>CLCA1</i>   | chloride channel accessory 1                        | Calcium activated chloride channel   |
| <i>CLCA2</i>   | chloride channel accessory 2                        | Calcium activated chloride channel   |
| <i>CLCA3</i>   | chloride channel accessory 3                        | Calcium activated chloride channel   |
| <i>CLCC1</i>   | chloride channel CLIC-like 1                        | Mid-1-related chloride channel       |
| <i>CLCN1</i>   | chloride channel, voltage-sensitive 1               | Voltage-sensitive chloride channel   |
| <i>CLCN2</i>   | chloride channel, voltage-sensitive 2               | Voltage-sensitive chloride channel   |
| <i>CLCN3</i>   | chloride channel, voltage-sensitive 3               | Voltage-sensitive chloride channel   |
| <i>CLCN4</i>   | chloride channel, voltage-sensitive 4               | Voltage-sensitive chloride channel   |
| <i>CLCN5</i>   | chloride channel, voltage-sensitive 5               | Voltage-sensitive chloride channel   |
| <i>CLCN6</i>   | chloride channel, voltage-sensitive 6               | Voltage-sensitive chloride channel   |
| <i>CLCN7</i>   | chloride channel, voltage-sensitive 7               | Voltage-sensitive chloride channel   |
| <i>CLCNKA</i>  | chloride channel, voltage-sensitive Ka              | Voltage-sensitive chloride channel   |
| <i>CLCNKB</i>  | chloride channel, voltage-sensitive Kb              | Voltage-sensitive chloride channel   |
| <i>CLIC1</i>   | chloride intracellular channel 1                    | Chloride intracellular channel       |
| <i>CLIC2</i>   | chloride intracellular channel 2                    | Chloride intracellular channel       |
| <i>CLIC3</i>   | chloride intracellular channel 3                    | Chloride intracellular channel       |
| <i>CLIC4</i>   | chloride intracellular channel 4                    | Chloride intracellular channel       |
| <i>CLIC5</i>   | chloride intracellular channel 5                    | Chloride intracellular channel       |
| <i>CLIC6</i>   | chloride intracellular channel 6                    | Chloride intracellular channel       |
| <i>CNGA1</i>   | cyclic nucleotide gated channel alpha 1             | Cyclic nucleotide-regulated channels |
| <i>CNGA2</i>   | cyclic nucleotide gated channel alpha 2             | Cyclic nucleotide-regulated channels |
| <i>CNGA3</i>   | cyclic nucleotide gated channel alpha 3             | Cyclic nucleotide-regulated channels |
| <i>CNGA4</i>   | cyclic nucleotide gated channel alpha 4             | Cyclic nucleotide-regulated channels |
| <i>CNGB1</i>   | cyclic nucleotide gated channel beta 1              | Cyclic nucleotide-regulated channels |
| <i>CNGB3</i>   | cyclic nucleotide gated channel beta 3              | Cyclic nucleotide-regulated channels |
| <i>GABARAP</i> | GABA(A) receptor-associated protein                 | GABA <sub>A</sub> receptors          |
| <i>GABRA1</i>  | gamma-aminobutyric acid (GABA) A receptor, alpha 1  | GABA <sub>A</sub> receptors          |
| <i>GABRA2</i>  | gamma-aminobutyric acid (GABA) A receptor, alpha 2  | GABA <sub>A</sub> receptors          |
| <i>GABRA3</i>  | gamma-aminobutyric acid (GABA) A receptor, alpha 3  | GABA <sub>A</sub> receptors          |
| <i>GABRA4</i>  | gamma-aminobutyric acid (GABA) A receptor, alpha 4  | GABA <sub>A</sub> receptors          |
| <i>GABRA5</i>  | gamma-aminobutyric acid (GABA) A receptor, alpha 5  | GABA <sub>A</sub> receptors          |

|               |                                                                         |                                      |
|---------------|-------------------------------------------------------------------------|--------------------------------------|
| <i>GABRA6</i> | gamma-aminobutyric acid (GABA) A receptor, alpha 6                      | GABA <sub>A</sub> receptors          |
| <i>GABRB1</i> | gamma-aminobutyric acid (GABA) A receptor, beta 1                       | GABA <sub>A</sub> receptors          |
| <i>GABRB2</i> | gamma-aminobutyric acid (GABA) A receptor, beta 2                       | GABA <sub>A</sub> receptors          |
| <i>GABRB3</i> | gamma-aminobutyric acid (GABA) A receptor, beta 3                       | GABA <sub>A</sub> receptors          |
| <i>GABRD</i>  | gamma-aminobutyric acid (GABA) A receptor, delta                        | GABA <sub>A</sub> receptors          |
| <i>GABRE</i>  | gamma-aminobutyric acid (GABA) A receptor, epsilon                      | GABA <sub>A</sub> receptors          |
| <i>GABRG1</i> | gamma-aminobutyric acid (GABA) A receptor, gamma 1                      | GABA <sub>A</sub> receptors          |
| <i>GABRG2</i> | gamma-aminobutyric acid (GABA) A receptor, gamma 2                      | GABA <sub>A</sub> receptors          |
| <i>GABRG3</i> | gamma-aminobutyric acid (GABA) A receptor, gamma 3                      | GABA <sub>A</sub> receptors          |
| <i>GABRP</i>  | gamma-aminobutyric acid (GABA) A receptor, pi                           | GABA <sub>A</sub> receptors          |
| <i>GABRQ</i>  | gamma-aminobutyric acid (GABA) A receptor, theta                        | GABA <sub>A</sub> receptors          |
| <i>GABRR1</i> | gamma-aminobutyric acid (GABA) A receptor, rho 1                        | GABA <sub>A</sub> receptors          |
| <i>GABRR2</i> | gamma-aminobutyric acid (GABA) A receptor, rho 2                        | GABA <sub>A</sub> receptors          |
| <i>GABRR3</i> | gamma-aminobutyric acid (GABA) A receptor, rho 3                        | GABA <sub>A</sub> receptors          |
| <i>GLRA1</i>  | glycine receptor, alpha 1                                               | Glycine receptors                    |
| <i>GLRA2</i>  | glycine receptor, alpha 2                                               | Glycine receptors                    |
| <i>GLRA3</i>  | glycine receptor, alpha 3                                               | Glycine receptors                    |
| <i>GLRA4</i>  | glycine receptor, alpha 4                                               | Glycine receptors                    |
| <i>GLRB</i>   | glycine receptor, beta                                                  | Glycine receptors                    |
| <i>GRIA1</i>  | glutamate receptor, ionotropic, AMPA 1                                  | Ionotropic glutamate receptors       |
| <i>GRIA2</i>  | glutamate receptor, ionotropic, AMPA 2                                  | Ionotropic glutamate receptors       |
| <i>GRIA3</i>  | glutamate receptor, ionotropic, AMPA 3                                  | Ionotropic glutamate receptors       |
| <i>GRIA4</i>  | glutamate receptor, ionotropic, AMPA 4                                  | Ionotropic glutamate receptors       |
| <i>GRID1</i>  | glutamate receptor, ionotropic, delta 1                                 | Ionotropic glutamate receptors       |
| <i>GRID2</i>  | glutamate receptor, ionotropic, delta 2                                 | Ionotropic glutamate receptors       |
| <i>GRIK1</i>  | glutamate receptor, ionotropic, kainate 1                               | Ionotropic glutamate receptors       |
| <i>GRIK2</i>  | glutamate receptor, ionotropic, kainate 2                               | Ionotropic glutamate receptors       |
| <i>GRIK3</i>  | glutamate receptor, ionotropic, kainate 3                               | Ionotropic glutamate receptors       |
| <i>GRIK4</i>  | glutamate receptor, ionotropic, kainate 4                               | Ionotropic glutamate receptors       |
| <i>GRIK5</i>  | glutamate receptor, ionotropic, kainate 5                               | Ionotropic glutamate receptors       |
| <i>GRIN1</i>  | glutamate receptor, ionotropic, N-methyl D-aspartate 1                  | Ionotropic glutamate receptors       |
| <i>GRIN2A</i> | glutamate receptor, ionotropic, N-methyl D-aspartate 2A                 | Ionotropic glutamate receptors       |
| <i>GRIN2B</i> | glutamate receptor, ionotropic, N-methyl D-aspartate 2B                 | Ionotropic glutamate receptors       |
| <i>GRIN2C</i> | glutamate receptor, ionotropic, N-methyl D-aspartate 2C                 | Ionotropic glutamate receptors       |
| <i>GRIN2D</i> | glutamate receptor, ionotropic, N-methyl D-aspartate 2D                 | Ionotropic glutamate receptors       |
| <i>GRIN3A</i> | glutamate receptor, ionotropic, N-methyl-D-aspartate 3A                 | Ionotropic glutamate receptors       |
| <i>GRIN3B</i> | glutamate receptor, ionotropic, N-methyl-D-aspartate 3B                 | Ionotropic glutamate receptors       |
| <i>HCN1</i>   | hyperpolarization activated cyclic nucleotide-gated potassium channel 1 | Cyclic nucleotide-regulated channels |
| <i>HCN2</i>   | hyperpolarization activated cyclic nucleotide-gated potassium channel 2 | Cyclic nucleotide-regulated channels |
| <i>HCN3</i>   | hyperpolarization activated cyclic nucleotide-gated potassium channel 3 | Cyclic nucleotide-regulated channels |
| <i>HCN4</i>   | hyperpolarization activated cyclic nucleotide-gated potassium channel 4 | Cyclic nucleotide-regulated channels |
| <i>HTR3A</i>  | 5-hydroxytryptamine (serotonin) receptor 3A, ionotropic                 | 5-HT <sub>3</sub> receptors          |
| <i>HTR3B</i>  | 5-hydroxytryptamine (serotonin) receptor 3B, ionotropic                 | 5-HT <sub>3</sub> receptors          |
| <i>HTR3C</i>  | 5-hydroxytryptamine (serotonin) receptor 3C, ionotropic                 | 5-HT <sub>3</sub> receptors          |
| <i>HTR3D</i>  | 5-hydroxytryptamine (serotonin) receptor 3D, ionotropic                 | 5-HT <sub>3</sub> receptors          |

|               |                                                                                                     |                                  |
|---------------|-----------------------------------------------------------------------------------------------------|----------------------------------|
| <i>HTR3E</i>  | 5-hydroxytryptamine (serotonin) receptor 3E, ionotropic                                             | 5-HT <sub>3</sub> receptors      |
| <i>HVCN1</i>  | hydrogen voltage-gated channel 1                                                                    | Voltage-gated proton channel     |
| <i>KCNA1</i>  | potassium voltage-gated channel, shaker-related subfamily, member 1 (episodic ataxia with myokymia) | Voltage-gated potassium channels |
| <i>KCNA10</i> | potassium voltage-gated channel, shaker-related subfamily, member 10                                | Voltage-gated potassium channels |
| <i>KCNA2</i>  | potassium voltage-gated channel, shaker-related subfamily, member 2                                 | Voltage-gated potassium channels |
| <i>KCNA3</i>  | potassium voltage-gated channel, shaker-related subfamily, member 3                                 | Voltage-gated potassium channels |
| <i>KCNA4</i>  | potassium voltage-gated channel, shaker-related subfamily, member 4                                 | Voltage-gated potassium channels |
| <i>KCNA5</i>  | potassium voltage-gated channel, shaker-related subfamily, member 5                                 | Voltage-gated potassium channels |
| <i>KCNA6</i>  | potassium voltage-gated channel, shaker-related subfamily, member 6                                 | Voltage-gated potassium channels |
| <i>KCNA7</i>  | potassium voltage-gated channel, shaker-related subfamily, member 7                                 | Voltage-gated potassium channels |
| <i>KCNAB1</i> | potassium voltage-gated channel, shaker-related subfamily, beta member 1                            | Voltage-gated potassium channels |
| <i>KCNAB2</i> | potassium voltage-gated channel, shaker-related subfamily, beta member 2                            | Voltage-gated potassium channels |
| <i>KCNAB3</i> | potassium voltage-gated channel, shaker-related subfamily, beta member 3                            | Voltage-gated potassium channels |
| <i>KCNB1</i>  | potassium voltage-gated channel, Shab-related subfamily, member 1                                   | Voltage-gated potassium channels |
| <i>KCNB2</i>  | potassium voltage-gated channel, Shab-related subfamily, member 2                                   | Voltage-gated potassium channels |
| <i>KCNC1</i>  | potassium voltage-gated channel, Shaw-related subfamily, member 1                                   | Voltage-gated potassium channels |
| <i>KCNC2</i>  | potassium voltage-gated channel, Shaw-related subfamily, member 2                                   | Voltage-gated potassium channels |
| <i>KCNC3</i>  | potassium voltage-gated channel, Shaw-related subfamily, member 3                                   | Voltage-gated potassium channels |
| <i>KCNC4</i>  | potassium voltage-gated channel, Shaw-related subfamily, member 4                                   | Voltage-gated potassium channels |
| <i>KCND1</i>  | potassium voltage-gated channel, Shal-related subfamily, member 1                                   | Voltage-gated potassium channels |
| <i>KCND2</i>  | potassium voltage-gated channel, Shal-related subfamily, member 2                                   | Voltage-gated potassium channels |
| <i>KCND3</i>  | potassium voltage-gated channel, Shal-related subfamily, member 3                                   | Voltage-gated potassium channels |
| <i>KCNE1</i>  | potassium voltage-gated channel, Isk-related family, member 1                                       | Voltage-gated potassium channels |
| <i>KCNE1L</i> | KCNE1-like                                                                                          | Voltage-gated potassium channels |
| <i>KCNE2</i>  | potassium voltage-gated channel, Isk-related family, member 2                                       | Voltage-gated potassium channels |
| <i>KCNE3</i>  | potassium voltage-gated channel, Isk-related family, member 3                                       | Voltage-gated potassium channels |
| <i>KCNE4</i>  | potassium voltage-gated channel, Isk-related family, member 4                                       | Voltage-gated potassium channels |
| <i>KCNF1</i>  | potassium voltage-gated channel, subfamily F, member 1                                              | Voltage-gated potassium channels |
| <i>KCNG1</i>  | potassium voltage-gated channel, subfamily G, member 1                                              | Voltage-gated potassium channels |
| <i>KCNG2</i>  | potassium voltage-gated channel, subfamily G, member 2                                              | Voltage-gated potassium channels |

|               |                                                                      |                                        |
|---------------|----------------------------------------------------------------------|----------------------------------------|
| <i>KCNG3</i>  | potassium voltage-gated channel, subfamily G, member 3               | Voltage-gated potassium channels       |
| <i>KCNG4</i>  | potassium voltage-gated channel, subfamily G, member 4               | Voltage-gated potassium channels       |
| <i>KCNH1</i>  | potassium voltage-gated channel, subfamily H (eag-related), member 1 | Voltage-gated potassium channels       |
| <i>KCNH2</i>  | potassium voltage-gated channel, subfamily H (eag-related), member 2 | Voltage-gated potassium channels       |
| <i>KCNH3</i>  | potassium voltage-gated channel, subfamily H (eag-related), member 3 | Voltage-gated potassium channels       |
| <i>KCNH4</i>  | potassium voltage-gated channel, subfamily H (eag-related), member 4 | Voltage-gated potassium channels       |
| <i>KCNH5</i>  | potassium voltage-gated channel, subfamily H (eag-related), member 5 | Voltage-gated potassium channels       |
| <i>KCNH6</i>  | potassium voltage-gated channel, subfamily H (eag-related), member 6 | Voltage-gated potassium channels       |
| <i>KCNH7</i>  | potassium voltage-gated channel, subfamily H (eag-related), member 7 | Voltage-gated potassium channels       |
| <i>KCNH8</i>  | potassium voltage-gated channel, subfamily H (eag-related), member 8 | Voltage-gated potassium channels       |
| <i>KCNJ1</i>  | potassium inwardly-rectifying channel, subfamily J, member 1         | Inwardly rectifying potassium channels |
| <i>KCNJ10</i> | potassium inwardly-rectifying channel, subfamily J, member 10        | Inwardly rectifying potassium channels |
| <i>KCNJ11</i> | potassium inwardly-rectifying channel, subfamily J, member 11        | Inwardly rectifying potassium channels |
| <i>KCNJ12</i> | potassium inwardly-rectifying channel, subfamily J, member 12        | Inwardly rectifying potassium channels |
| <i>KCNJ13</i> | potassium inwardly-rectifying channel, subfamily J, member 13        | Inwardly rectifying potassium channels |
| <i>KCNJ14</i> | potassium inwardly-rectifying channel, subfamily J, member 14        | Inwardly rectifying potassium channels |
| <i>KCNJ15</i> | potassium inwardly-rectifying channel, subfamily J, member 15        | Inwardly rectifying potassium channels |
| <i>KCNJ16</i> | potassium inwardly-rectifying channel, subfamily J, member 16        | Inwardly rectifying potassium channels |
| <i>KCNJ18</i> | potassium inwardly-rectifying channel, subfamily J, member 18        | Inwardly rectifying potassium channels |
| <i>KCNJ2</i>  | potassium inwardly-rectifying channel, subfamily J, member 2         | Inwardly rectifying potassium channels |
| <i>KCNJ3</i>  | potassium inwardly-rectifying channel, subfamily J, member 3         | Inwardly rectifying potassium channels |
| <i>KCNJ4</i>  | potassium inwardly-rectifying channel, subfamily J, member 4         | Inwardly rectifying potassium channels |
| <i>KCNJ5</i>  | potassium inwardly-rectifying channel, subfamily J, member 5         | Inwardly rectifying potassium channels |
| <i>KCNJ6</i>  | potassium inwardly-rectifying channel, subfamily J, member 6         | Inwardly rectifying potassium channels |
| <i>KCNJ8</i>  | potassium inwardly-rectifying channel, subfamily J, member 8         | Inwardly rectifying potassium channels |
| <i>KCNJ9</i>  | potassium inwardly-rectifying channel, subfamily J, member 9         | Inwardly rectifying potassium channels |
| <i>KCNK1</i>  | potassium channel, subfamily K, member 1                             | Two-P potassium channels               |
| <i>KCNK10</i> | potassium channel, subfamily K, member 10                            | Two-P potassium channels               |
| <i>KCNK12</i> | potassium channel, subfamily K, member 12                            | Two-P potassium channels               |
| <i>KCNK13</i> | potassium channel, subfamily K, member 13                            | Two-P potassium channels               |

|               |                                                                                           |                                      |
|---------------|-------------------------------------------------------------------------------------------|--------------------------------------|
| <i>KCNK15</i> | potassium channel, subfamily K, member 15                                                 | Two-P potassium channels             |
| <i>KCNK16</i> | potassium channel, subfamily K, member 16                                                 | Two-P potassium channels             |
| <i>KCNK17</i> | potassium channel, subfamily K, member 17                                                 | Two-P potassium channels             |
| <i>KCNK18</i> | potassium channel, subfamily K, member 18                                                 | Two-P potassium channels             |
| <i>KCNK2</i>  | potassium channel, subfamily K, member 2                                                  | Two-P potassium channels             |
| <i>KCNK3</i>  | potassium channel, subfamily K, member 3                                                  | Two-P potassium channels             |
| <i>KCNK4</i>  | potassium channel, subfamily K, member 4                                                  | Two-P potassium channels             |
| <i>KCNK5</i>  | potassium channel, subfamily K, member 5                                                  | Two-P potassium channels             |
| <i>KCNK6</i>  | potassium channel, subfamily K, member 6                                                  | Two-P potassium channels             |
| <i>KCNK7</i>  | potassium channel, subfamily K, member 7                                                  | Two-P potassium channels             |
| <i>KCNK9</i>  | potassium channel, subfamily K, member 9                                                  | Two-P potassium channels             |
| <i>KCNMA1</i> | potassium large conductance calcium-activated channel, subfamily M, alpha member 1        | Calcium-activated potassium channels |
| <i>KCNMB1</i> | potassium large conductance calcium-activated channel, subfamily M, beta member 1         | Calcium-activated potassium channels |
| <i>KCNMB2</i> | potassium large conductance calcium-activated channel, subfamily M, beta member 2         | Calcium-activated potassium channels |
| <i>KCNMB3</i> | potassium large conductance calcium-activated channel, subfamily M beta member 3          | Calcium-activated potassium channels |
| <i>KCNMB4</i> | potassium large conductance calcium-activated channel, subfamily M, beta member 4         | Calcium-activated potassium channels |
| <i>KCNN1</i>  | potassium intermediate/small conductance calcium-activated channel, subfamily N, member 1 | Calcium-activated potassium channels |
| <i>KCNN2</i>  | potassium intermediate/small conductance calcium-activated channel, subfamily N, member 2 | Calcium-activated potassium channels |
| <i>KCNN3</i>  | potassium intermediate/small conductance calcium-activated channel, subfamily N, member 3 | Calcium-activated potassium channels |
| <i>KCNN4</i>  | potassium intermediate/small conductance calcium-activated channel, subfamily N, member 4 | Calcium-activated potassium channels |
| <i>KCNQ1</i>  | potassium voltage-gated channel, KQT-like subfamily, member 1                             | Voltage-gated potassium channels     |
| <i>KCNQ2</i>  | potassium voltage-gated channel, KQT-like subfamily, member 2                             | Voltage-gated potassium channels     |
| <i>KCNQ3</i>  | potassium voltage-gated channel, KQT-like subfamily, member 3                             | Voltage-gated potassium channels     |
| <i>KCNQ4</i>  | potassium voltage-gated channel, KQT-like subfamily, member 4                             | Voltage-gated potassium channels     |
| <i>KCNQ5</i>  | potassium voltage-gated channel, KQT-like subfamily, member 5                             | Voltage-gated potassium channels     |
| <i>KCNS1</i>  | potassium voltage-gated channel, delayed-rectifier, subfamily S, member 1                 | Voltage-gated potassium channels     |
| <i>KCNS2</i>  | potassium voltage-gated channel, delayed-rectifier, subfamily S, member 2                 | Voltage-gated potassium channels     |
| <i>KCNS3</i>  | potassium voltage-gated channel, delayed-rectifier, subfamily S, member 3                 | Voltage-gated potassium channels     |
| <i>KCNT1</i>  | potassium channel, subfamily T, member 1                                                  | Calcium-activated potassium channels |
| <i>KCNT2</i>  | potassium channel, subfamily T, member 2                                                  | Calcium-activated potassium channels |
| <i>KCNU1</i>  | potassium channel, subfamily U, member 1                                                  | Calcium-activated potassium channels |
| <i>KCNV1</i>  | potassium channel, subfamily V, member 1                                                  | Voltage-gated potassium channels     |
| <i>KCNV2</i>  | potassium channel, subfamily V, member 2                                                  | Voltage-gated potassium channels     |

|               |                                                                    |                                       |
|---------------|--------------------------------------------------------------------|---------------------------------------|
| <i>MCOLN1</i> | mucolipin 1                                                        | Transient receptor potential channels |
| <i>MCOLN2</i> | mucolipin 2                                                        | Transient receptor potential channels |
| <i>MCOLN3</i> | mucolipin 3                                                        | Transient receptor potential channels |
| <i>NALCN</i>  | sodium leak channel, non-selective                                 | Voltage-independent cation channel    |
| <i>P2RX1</i>  | purinergic receptor P2X, ligand-gated ion channel, 1               | P2X receptors                         |
| <i>P2RX2</i>  | purinergic receptor P2X, ligand-gated ion channel, 2               | P2X receptors                         |
| <i>P2RX3</i>  | purinergic receptor P2X, ligand-gated ion channel, 3               | P2X receptors                         |
| <i>P2RX4</i>  | purinergic receptor P2X, ligand-gated ion channel, 4               | P2X receptors                         |
| <i>P2RX5</i>  | purinergic receptor P2X, ligand-gated ion channel, 5               | P2X receptors                         |
| <i>P2RX6</i>  | purinergic receptor P2X, ligand-gated ion channel, 6               | P2X receptors                         |
| <i>P2RX7</i>  | purinergic receptor P2X, ligand-gated ion channel, 7               | P2X receptors                         |
| <i>PKD1</i>   | polycystic kidney disease 1 (autosomal dominant)                   | Transient receptor potential channels |
| <i>PKD2</i>   | polycystic kidney disease 2 (autosomal dominant)                   | Transient receptor potential channels |
| <i>PKD2L1</i> | polycystic kidney disease 2-like 1                                 | Transient receptor potential channels |
| <i>PKD2L2</i> | polycystic kidney disease 2-like 2                                 | Transient receptor potential channels |
| <i>SCN10A</i> | sodium channel, voltage-gated, type X, alpha subunit               | Voltage-gated sodium channels         |
| <i>SCN11A</i> | sodium channel, voltage-gated, type XI, alpha subunit              | Voltage-gated sodium channels         |
| <i>SCN1A</i>  | sodium channel, voltage-gated, type I, alpha subunit               | Voltage-gated sodium channels         |
| <i>SCN1B</i>  | sodium channel, voltage-gated, type I, beta subunit                | Voltage-gated sodium channels         |
| <i>SCN2A</i>  | sodium channel, voltage-gated, type II, alpha subunit              | Voltage-gated sodium channels         |
| <i>SCN2B</i>  | sodium channel, voltage-gated, type II, beta subunit               | Voltage-gated sodium channels         |
| <i>SCN3A</i>  | sodium channel, voltage-gated, type III, alpha subunit             | Voltage-gated sodium channels         |
| <i>SCN3B</i>  | sodium channel, voltage-gated, type III, beta subunit              | Voltage-gated sodium channels         |
| <i>SCN4A</i>  | sodium channel, voltage-gated, type IV, alpha subunit              | Voltage-gated sodium channels         |
| <i>SCN4B</i>  | sodium channel, voltage-gated, type IV, beta subunit               | Voltage-gated sodium channels         |
| <i>SCN5A</i>  | sodium channel, voltage-gated, type V, alpha subunit               | Voltage-gated sodium channels         |
| <i>SCN7A</i>  | sodium channel, voltage-gated, type VII, alpha subunit             | Voltage-gated sodium channels         |
| <i>SCN8A</i>  | sodium channel, voltage gated, type VIII, alpha subunit            | Voltage-gated sodium channels         |
| <i>SCN9A</i>  | sodium channel, voltage-gated, type IX, alpha subunit              | Voltage-gated sodium channels         |
| <i>SCNN1A</i> | sodium channel, non-voltage-gated 1 alpha subunit                  | Nonvoltage-gated sodium channels      |
| <i>SCNN1B</i> | sodium channel, non-voltage-gated 1, beta subunit                  | Nonvoltage-gated sodium channels      |
| <i>SCNN1D</i> | sodium channel, non-voltage-gated 1, delta subunit                 | Nonvoltage-gated sodium channels      |
| <i>SCNN1G</i> | sodium channel, non-voltage-gated 1, gamma subunit                 | Nonvoltage-gated sodium channels      |
| <i>TPCN1</i>  | two pore segment channel 1                                         | CatSper and two-pore channels         |
| <i>TPCN2</i>  | two pore segment channel 2                                         | CatSper and two-pore channels         |
| <i>TRPA1</i>  | transient receptor potential cation channel, subfamily A, member 1 | Transient receptor potential channels |
| <i>TRPC1</i>  | transient receptor potential cation channel, subfamily C, member 1 | Transient receptor potential channels |
| <i>TRPC3</i>  | transient receptor potential cation channel, subfamily C, member 3 | Transient receptor potential channels |
| <i>TRPC4</i>  | transient receptor potential cation channel, subfamily C, member 4 | Transient receptor potential channels |

|              |                                                                    |                                       |
|--------------|--------------------------------------------------------------------|---------------------------------------|
| <i>TRPC5</i> | transient receptor potential cation channel, subfamily C, member 5 | Transient receptor potential channels |
| <i>TRPC6</i> | transient receptor potential cation channel, subfamily C, member 6 | Transient receptor potential channels |
| <i>TRPC7</i> | transient receptor potential cation channel, subfamily C, member 7 | Transient receptor potential channels |
| <i>TRPM1</i> | transient receptor potential cation channel, subfamily M, member 1 | Transient receptor potential channels |
| <i>TRPM2</i> | transient receptor potential cation channel, subfamily M, member 2 | Transient receptor potential channels |
| <i>TRPM3</i> | transient receptor potential cation channel, subfamily M, member 3 | Transient receptor potential channels |
| <i>TRPM4</i> | transient receptor potential cation channel, subfamily M, member 4 | Transient receptor potential channels |
| <i>TRPM5</i> | transient receptor potential cation channel, subfamily M, member 5 | Transient receptor potential channels |
| <i>TRPM6</i> | transient receptor potential cation channel, subfamily M, member 6 | Transient receptor potential channels |
| <i>TRPM7</i> | transient receptor potential cation channel, subfamily M, member 7 | Transient receptor potential channels |
| <i>TRPM8</i> | transient receptor potential cation channel, subfamily M, member 8 | Transient receptor potential channels |
| <i>TRPV1</i> | transient receptor potential cation channel, subfamily V, member 1 | Transient receptor potential channels |
| <i>TRPV2</i> | transient receptor potential cation channel, subfamily V, member 2 | Transient receptor potential channels |
| <i>TRPV3</i> | transient receptor potential cation channel, subfamily V, member 3 | Transient receptor potential channels |
| <i>TRPV4</i> | transient receptor potential cation channel, subfamily V, member 4 | Transient receptor potential channels |
| <i>TRPV5</i> | transient receptor potential cation channel, subfamily V, member 5 | Transient receptor potential channels |
| <i>TRPV6</i> | transient receptor potential cation channel, subfamily V, member 6 | Transient receptor potential channels |
| <i>VDAC1</i> | voltage-dependent anion channel 1                                  | voltage-dependent anion channel       |
| <i>VDAC2</i> | voltage-dependent anion channel 2                                  | voltage-dependent anion channel       |
| <i>VDAC3</i> | voltage-dependent anion channel 3                                  | voltage-dependent anion channel       |
| <i>ZACN</i>  | zinc activated ligand-gated ion channel                            | ZAC                                   |



Table S2. Comparison in gene expression level between p53 mutant and wildtype tumors in validation cohorts

| Gene symbol     | FRA                      |                                       |
|-----------------|--------------------------|---------------------------------------|
|                 | Fold change <sup>a</sup> | Adjusted <i>P</i> -value <sup>b</sup> |
| <i>ANO1</i>     | 0.69                     | 5.93E-03                              |
| <i>CACNA1D</i>  | 0.58                     | 2.13E-04                              |
| <i>CACNA2D1</i> | 0.99                     | 2.44E-01                              |
| <i>CACNA2D2</i> | 0.50                     | 2.13E-04                              |
| <i>CLCA2</i>    | 2.00                     | 4.04E-01                              |
| <i>CLIC5</i>    | 1.02                     | 8.28E-01                              |
| <i>CLIC6</i>    | 0.68                     | 1.87E-02                              |
| <i>GLRB</i>     | 0.64                     | 6.92E-04                              |
| <i>KCND3</i>    | 0.74                     | 5.59E-05                              |
| <i>KCNE3</i>    | 1.04                     | 2.35E-01                              |
| <i>KCNE4</i>    | 0.42                     | 6.92E-04                              |
| <i>KCNJ3</i>    | 0.49                     | 1.43E-02                              |
| <i>KCNK1</i>    | 1.11                     | 2.35E-01                              |
| <i>KCNK6</i>    | 0.71                     | 1.80E-03                              |
| <i>KCNMA1</i>   | 0.83                     | 1.08E-02                              |
| <i>KCNN4</i>    | 1.53                     | 7.61E-04                              |
| <i>MCOLN2</i>   | 1.28                     | 4.19E-02                              |
| <i>P2RX4</i>    | 0.78                     | 5.06E-03                              |
| <i>SCN7A</i>    | 0.84                     | 3.13E-03                              |
| <i>SCNN1A</i>   | 0.84                     | 4.49E-03                              |
| <i>TPCN1</i>    | 0.96                     | 2.03E-01                              |
| <i>TRPC1</i>    | 0.92                     | 2.35E-01                              |

<sup>a</sup> Fold change is calculated by dividing the mean expression of p53 mutant tumor by the mean expression of p53 wildtype tumor.

<sup>b</sup> *P*-value is calculated by two-tailed t-test and adjusted by Benjamini & Hochberg correction.

Table S3. Comparison in gene expression level between ER positive and negative tumors

| Gene symbol     | FRA                      |                                       | USA1                     |                                       | USA2                     |                                       |
|-----------------|--------------------------|---------------------------------------|--------------------------|---------------------------------------|--------------------------|---------------------------------------|
|                 | Fold change <sup>a</sup> | Adjusted <i>P</i> -value <sup>b</sup> | Fold change <sup>a</sup> | Adjusted <i>P</i> -value <sup>b</sup> | Fold change <sup>a</sup> | Adjusted <i>P</i> -value <sup>b</sup> |
| <i>ANO1</i>     | 1.60                     | 9.74E-08                              | 1.86                     | 1.05E-12                              | 1.57                     | 1.45E-05                              |
| <i>CACNA1A</i>  | 0.84                     | 2.24E-03                              | 0.84                     | 1.54E-04                              | 0.75                     | 4.66E-04                              |
| <i>CACNA1D</i>  | 2.49                     | 1.83E-21                              | 1.80                     | 1.25E-22                              | 1.90                     | 1.09E-12                              |
| <i>CACNA2D1</i> | 1.13                     | 2.26E-02                              | 0.96                     | 1.72E-01                              | 0.96                     | 5.30E-01                              |
| <i>CACNA2D2</i> | 2.48                     | 9.18E-16                              | 2.19                     | 5.05E-23                              | 2.23                     | 2.06E-14                              |
| <i>CLCA2</i>    | 0.19                     | 8.86E-06                              | 0.93                     | 4.17E-01                              | 0.50                     | 1.61E-02                              |
| <i>CLIC4</i>    | 0.72                     | 1.68E-04                              | 0.60                     | 1.64E-24                              | 0.67                     | 3.65E-10                              |
| <i>CLIC6</i>    | 7.29                     | 8.25E-18                              | NA                       | NA                                    | NA                       | NA                                    |
| <i>GABRP</i>    | 0.12                     | 1.04E-14                              | 0.14                     | 1.05E-29                              | 0.20                     | 4.02E-09                              |
| <i>GLRB</i>     | 2.11                     | 2.50E-14                              | 1.96                     | 1.94E-10                              | 2.20                     | 3.90E-11                              |
| <i>KCNAB2</i>   | 0.92                     | 1.96E-03                              | 0.89                     | 8.32E-04                              | 0.95                     | 2.80E-01                              |
| <i>KCND3</i>    | 1.46                     | 3.37E-09                              | 1.48                     | 4.40E-13                              | 1.70                     | 3.65E-10                              |
| <i>KCNE3</i>    | 0.86                     | 3.65E-06                              | NA                       | NA                                    | NA                       | NA                                    |
| <i>KCNE4</i>    | 3.80                     | 8.25E-18                              | 5.43                     | 1.22E-28                              | 3.34                     | 2.58E-13                              |
| <i>KCNJ3</i>    | 7.88                     | 2.50E-14                              | 2.25                     | 4.74E-13                              | 1.84                     | 4.06E-06                              |
| <i>KCNK6</i>    | 1.84                     | 3.37E-14                              | NA                       | NA                                    | NA                       | NA                                    |
| <i>KCNMA1</i>   | 1.02                     | 1.81E-01                              | 1.27                     | 1.17E-06                              | 1.38                     | 1.37E-04                              |
| <i>KCNN4</i>    | 0.37                     | 3.80E-20                              | 0.44                     | 5.05E-23                              | 0.34                     | 2.06E-14                              |
| <i>KCNS3</i>    | 1.16                     | 2.60E-01                              | 1.36                     | 7.85E-07                              | 1.19                     | 1.61E-02                              |
| <i>MCOLN2</i>   | 0.65                     | 8.61E-09                              | NA                       | NA                                    | NA                       | NA                                    |
| <i>P2RX4</i>    | 1.51                     | 3.12E-11                              | 1.51                     | 1.97E-25                              | 1.31                     | 2.23E-03                              |
| <i>SCN7A</i>    | 1.27                     | 2.88E-06                              | 1.04                     | 2.70E-01                              | 1.13                     | 1.05E-01                              |
| <i>SCNN1A</i>   | 1.43                     | 5.77E-11                              | 1.69                     | 4.85E-20                              | 1.46                     | 3.43E-08                              |
| <i>TPCN1</i>    | 1.13                     | 1.37E-06                              | 1.28                     | 8.25E-11                              | 1.16                     | 2.38E-03                              |

<sup>a</sup> Fold change is calculated by dividing the mean expression of ER positive tumor by the mean expression of ER negative tumor.

<sup>b</sup> *P*-value is calculated by two-tailed t-test and adjusted by Benjamini & Hochberg correction.

Table S4. Correlation between gene expression and histological tumor grade

| Gene symbol     | FRA      |                                       | GER      |                                       | USA1     |                                       |
|-----------------|----------|---------------------------------------|----------|---------------------------------------|----------|---------------------------------------|
|                 | $\rho^a$ | Adjusted <i>P</i> -value <sup>b</sup> | $\rho^a$ | Adjusted <i>P</i> -value <sup>b</sup> | $\rho^a$ | Adjusted <i>P</i> -value <sup>b</sup> |
| <i>ANO1</i>     | -0.17    | 9.08E-03                              | -0.26    | 7.24E-04                              | -0.24    | 5.09E-07                              |
| <i>CACNA1D</i>  | -0.44    | 2.03E-12                              | -0.45    | 7.54E-10                              | -0.38    | 3.24E-16                              |
| <i>CACNA2D1</i> | -0.21    | 1.13E-03                              | 0.02     | 7.75E-01                              | -0.06    | 2.88E-01                              |
| <i>CACNA2D2</i> | -0.33    | 1.59E-07                              | -0.36    | 2.04E-06                              | -0.33    | 6.13E-13                              |
| <i>CLIC1</i>    | 0.24     | 1.66E-04                              | 0.09     | 2.27E-01                              | 0.14     | 2.61E-03                              |
| <i>CLIC4</i>    | 0.21     | 1.05E-03                              | 0.06     | 3.97E-01                              | 0.25     | 1.16E-07                              |
| <i>CLIC5</i>    | -0.14    | 3.41E-02                              | -0.17    | 3.16E-02                              | -0.10    | 4.21E-02                              |
| <i>CLIC6</i>    | -0.34    | 9.74E-08                              | NA       | NA                                    | NA       | NA                                    |
| <i>GLRB</i>     | -0.40    | 1.43E-10                              | -0.31    | 5.91E-05                              | -0.22    | 1.87E-06                              |
| <i>KCNAB2</i>   | 0.28     | 9.70E-06                              | 0.25     | 1.23E-03                              | 0.15     | 1.63E-03                              |
| <i>KCND3</i>    | -0.42    | 9.95E-12                              | -0.22    | 3.40E-03                              | -0.28    | 3.97E-09                              |
| <i>KCNE3</i>    | 0.34     | 6.01E-08                              | NA       | NA                                    | NA       | NA                                    |
| <i>KCNE4</i>    | -0.32    | 2.50E-07                              | -0.28    | 2.78E-04                              | -0.36    | 7.39E-15                              |
| <i>KCNK1</i>    | 0.17     | 7.76E-03                              | 0.10     | 1.88E-01                              | 0.12     | 1.65E-02                              |
| <i>KCNMA1</i>   | -0.28    | 9.70E-06                              | -0.24    | 1.38E-03                              | -0.27    | 1.04E-08                              |
| <i>KCNN4</i>    | 0.37     | 4.86E-09                              | 0.17     | 2.81E-02                              | 0.25     | 1.12E-07                              |
| <i>MCOLN2</i>   | 0.40     | 1.43E-10                              | NA       | NA                                    | NA       | NA                                    |
| <i>P2RX4</i>    | -0.20    | 1.68E-03                              | -0.23    | 2.86E-03                              | -0.28    | 4.86E-09                              |
| <i>PKD1</i>     | -0.02    | 7.68E-01                              | -0.16    | 3.67E-02                              | -0.02    | 6.02E-01                              |
| <i>PKD2</i>     | -0.01    | 8.34E-01                              | -0.23    | 2.36E-03                              | -0.03    | 4.83E-01                              |
| <i>SCN1B</i>    | -0.29    | 6.46E-06                              | -0.07    | 3.67E-01                              | -0.03    | 4.83E-01                              |
| <i>SCN7A</i>    | -0.51    | 3.77E-17                              | -0.02    | 7.75E-01                              | -0.04    | 4.34E-01                              |
| <i>SCNN1A</i>   | -0.21    | 1.13E-03                              | -0.15    | 5.48E-02                              | -0.36    | 1.42E-14                              |
| <i>TPCN1</i>    | -0.22    | 7.85E-04                              | -0.37    | 1.28E-06                              | -0.27    | 9.87E-09                              |
| <i>TPCN2</i>    | 0.10     | 1.09E-01                              | NA       | NA                                    | NA       | NA                                    |
| <i>TRPC1</i>    | -0.13    | 4.86E-02                              | -0.26    | 6.99E-04                              | -0.13    | 8.13E-03                              |
| <i>TRPM4</i>    | -0.22    | 5.94E-04                              | -0.09    | 2.62E-01                              | -0.15    | 1.89E-03                              |
| <i>VDAC1</i>    | 0.21     | 1.14E-03                              | 0.13     | 1.04E-01                              | 0.04     | 4.17E-01                              |
| <i>VDAC2</i>    | 0.37     | 4.86E-09                              | 0.21     | 6.17E-03                              | 0.20     | 2.20E-05                              |
| <i>VDAC3</i>    | 0.30     | 2.85E-06                              | 0.12     | 1.41E-01                              | 0.16     | 7.21E-04                              |

<sup>a</sup>  $\rho$  is the Spearman's rank correlation coefficient.

<sup>b</sup> *P*-value is calculated by Spearman's rank correlation test and adjusted by Benjamini & Hochberg correction.

Table S5. Comparison in prognostic power between IC30 and clinicopathological factors for the USA1 cohort. Hazard ratio was calculated separately for each variable by univariate Cox proportional hazard regression of survival.

| Covariate                       | Hazard ratio | 95% Confidence interval | <i>P</i> -value |
|---------------------------------|--------------|-------------------------|-----------------|
| IC30 + vs. -                    | 3.11         | (2.05, 4.70)            | 9.06E-8         |
| Age (per year)                  | 1.00         | (0.98, 1.02)            | 8.60E-1         |
| Lymph node + vs. -              | 2.48         | (1.67, 3.68)            | 6.20E-6         |
| Tumor size $\geq$ T3 vs. $<$ T3 | 1.79         | (1.23, 2.60)            | 2.35E-3         |
| Grade 3 vs. 1,2                 | 1.57         | (1.05, 2.37)            | 2.95E-2         |
| ER + vs. -                      | 0.35         | (0.24, 0.52)            | 1.03E-7         |
| PR + vs. -                      | 0.39         | (0.26, 0.58)            | 4.91E-6         |

Table S6. Comparison in prognostic power between IC30 and clinicopathological factors for the FRA cohort. Hazard ratio was calculated separately for each variable by univariate Cox proportional hazard regression of survival.

| Covariate                | Hazard ratio | 95% Confidence interval | <i>P</i> -value |
|--------------------------|--------------|-------------------------|-----------------|
| IC30 + vs. -             | 1.99         | (1.28, 3.10)            | 0.002           |
| Age (per year)           | 1.00         | (0.98, 1.02)            | 0.948           |
| Grade 3 vs. 1,2          | 1.66         | (1.07, 2.59)            | 0.025           |
| ER + vs. -               | 0.66         | (0.43, 1.02)            | 0.059           |
| PR + vs. -               | 0.84         | (0.55, 1.30)            | 0.435           |
| p53 mutant vs. wild-type | 1.72         | (1.05, 2.82)            | 0.031           |
